# Supplementary material
Source: Springer Nature journal article supplement (https://www.springermedizin.de/resource/supplementary/12967_2009_406_MOESM1_ESM.pdf/9576402)
Supplement: MOESM1 [file 9576402]

## Donor Identification

People

Patients

Donors

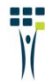

Public Engagement

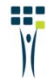

Data Infrastructure

## Collection & Processing

Hospital Pathology

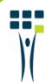

Biospecimen Collection Units

## Distribution

Biobanks

Biospecimen Banks

Research Studies

Clinical Trials

Translational Research

Better Health
